# Supplementary material for: Au@CdS Core–Shell Nanoparticles‐Modified ZnO Nanowires Photoanode for Efficient Photoelectrochemical Water Splitting
Source: PubMed Central journal article supplement (PMC5115296; doi:10.1002/advs.201500135), 2015-07-17
Supplement: ADVS-2-0q-s001.pdf [file ADVS-2-0q-s001.pdf]

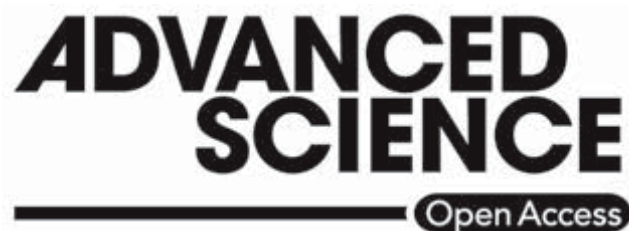

## Supporting Information

for *Adv. Sci.*, DOI: 10.1002/advs. 201500135

**Au@CdS Core–Shell Nanoparticles-Modified ZnO Nanowires  
Photoanode for Efficient Photoelectrochemical Water Splitting**

*Chun Xian Guo, Jiale Xie, Hongbin Yang, and Chang Ming  
Li\**

Supporting Information

**Au@CdS Core-Shell Nanoparticles-modified ZnO Nanowires Photoanode for Efficient Photoelectrochemical Water Splitting**

*Chun Xian Guo, Jiale Xie, Hongbin Yang, and Chang Ming Li \**

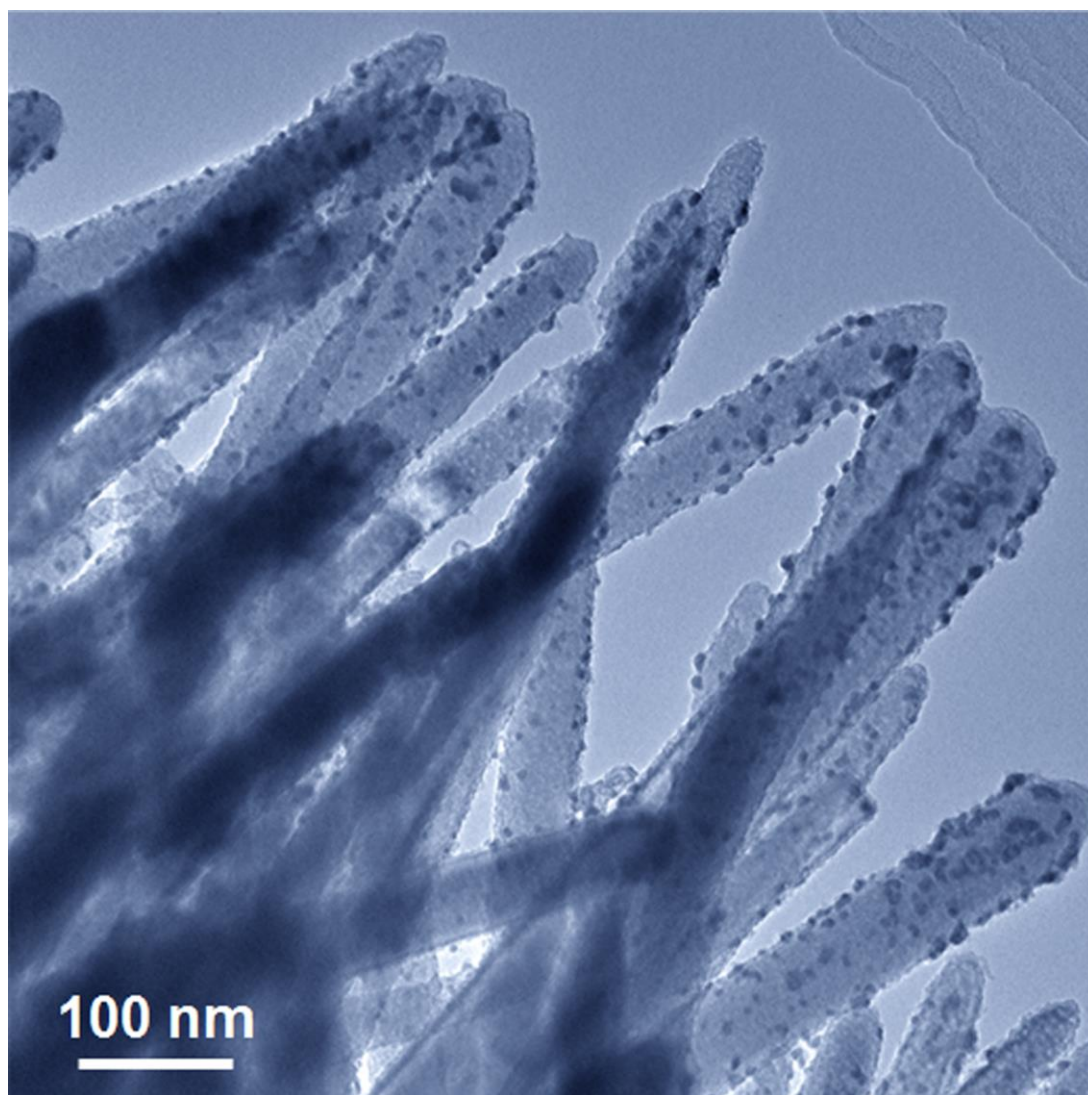

**Figure S1.** TEM image of Au@CdS-ZnO.

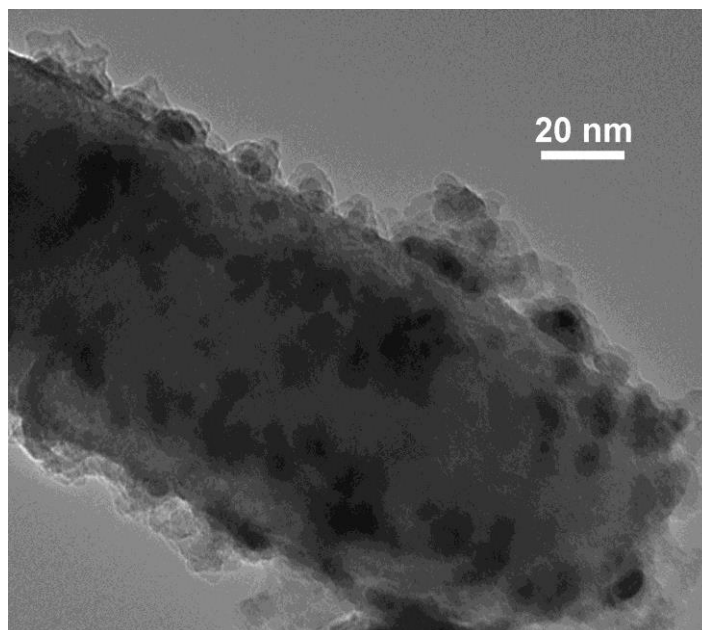

**Figure S2.** TEM image showing the Au@CdS core-shell nanoparticles anchored ZnO nanowire.

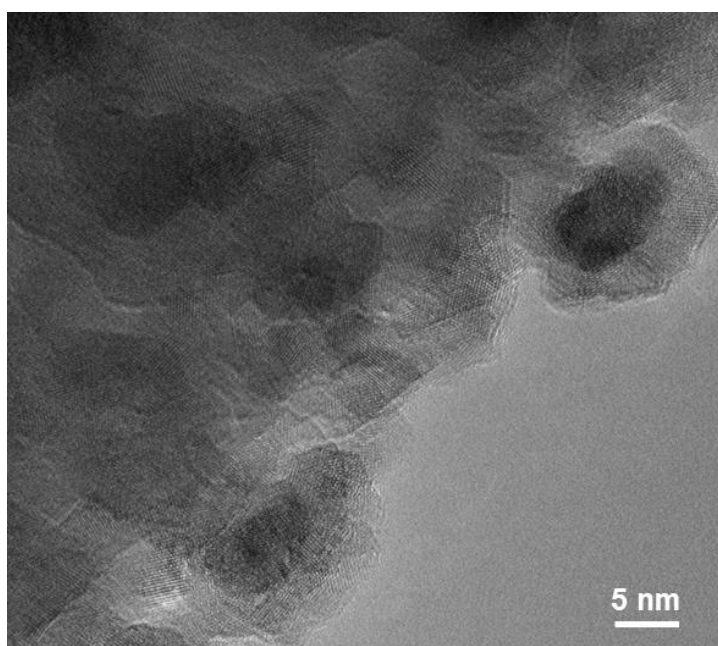

**Figure S3.** HRTEM image showing the detailed Au@CdS core-shell structure on ZnO.

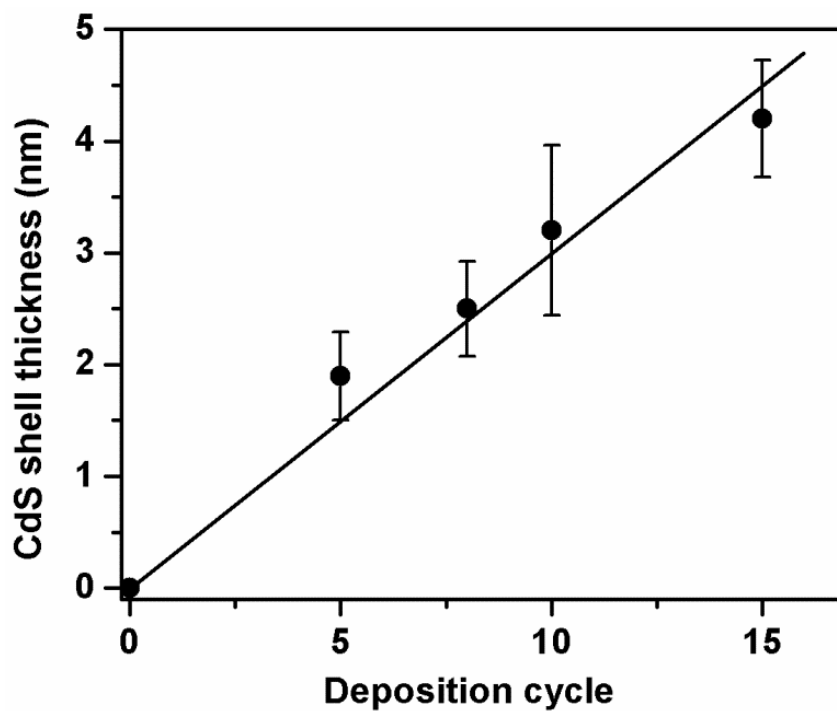

**Figure S4.** Relation between shell thickness of CdS and the sequential chemical bath deposition cycle.

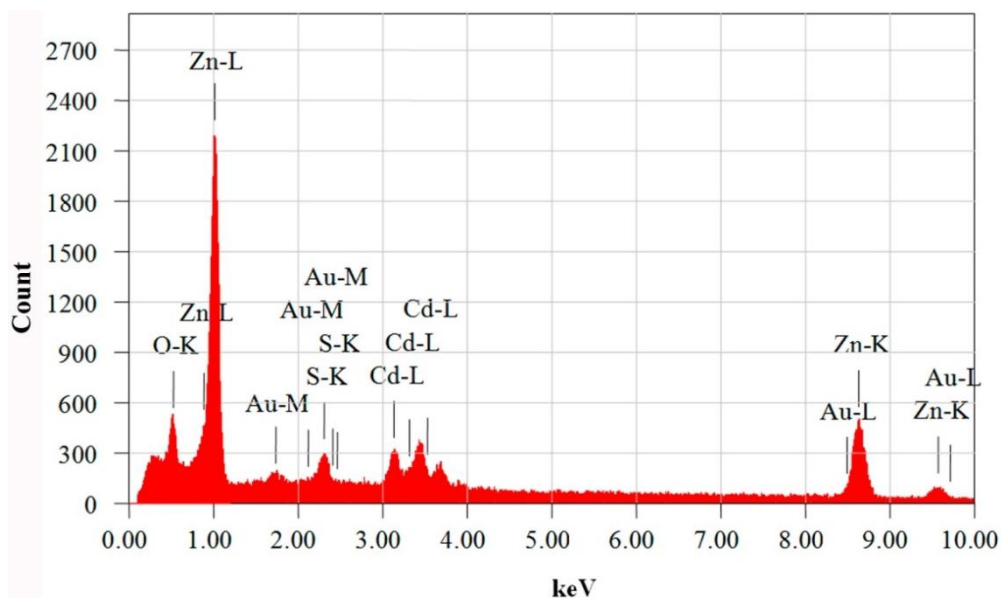

**Figure S5.** Energy dispersive X-ray spectroscopy spectrum showing the composition of the Au@CdS-ZnO.

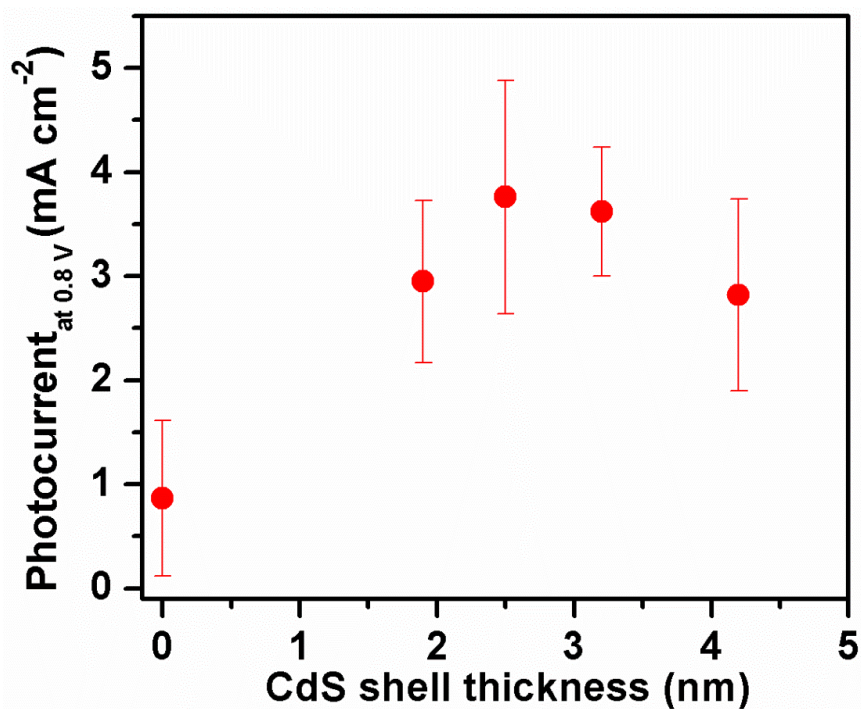

**Figure S6.** Dependence of photocurrent density at an applied bias of +0.8 V with CdS shell thickness. The error bars represent standard deviation.

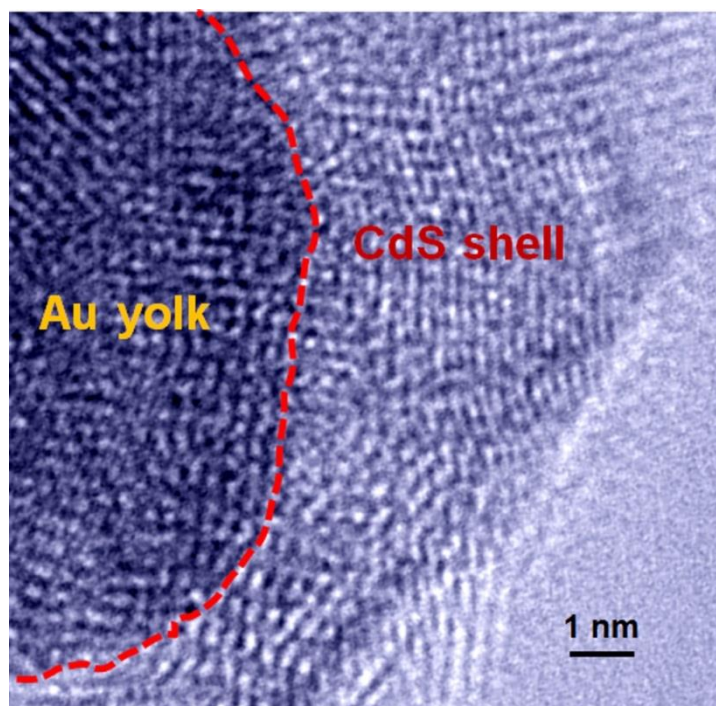

**Figure S7.** TEM image showing interface between Au and CdS of Au@CdS-ZnO.

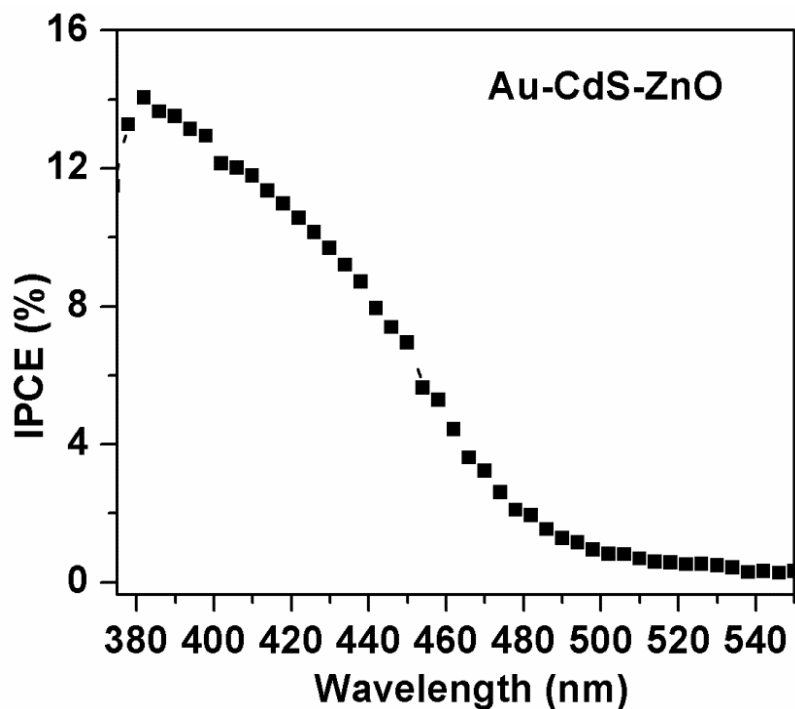

**Figure S8.** IPCE spectrum of the PEC cell of Au-CdS-ZnO. No external bias is applied.

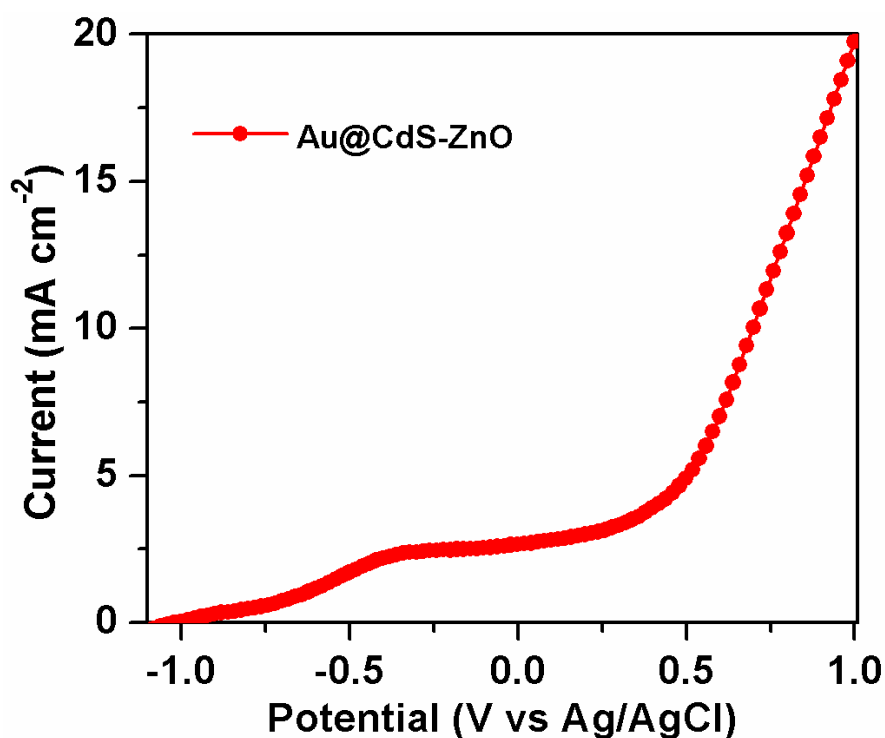

**Figure S9.** Linear-sweep voltammogram of PEC cell comprising the Au@CdS-ZnO photoanode, Ag/AgCl reference electrode and Pt counter electrode under AM1.5 light irradiation. Aqueous electrolyte composing of 0.25 M Na<sub>2</sub>S and 0.35 M Na<sub>2</sub>SO<sub>3</sub>.

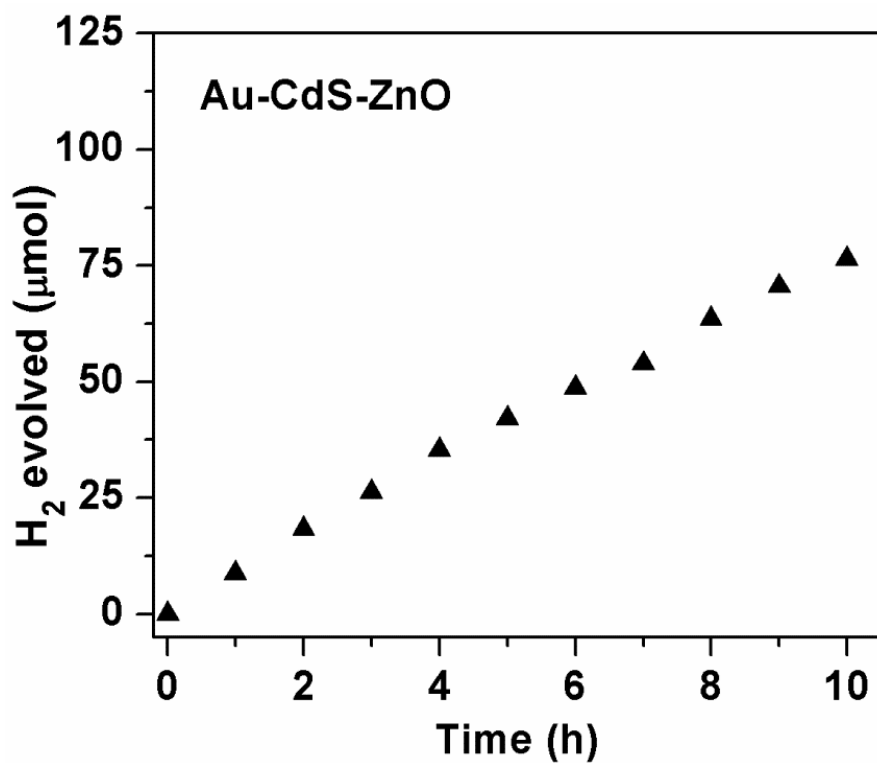

**Figure S10.** Time courses of H<sub>2</sub> evolution of Au-CdS-ZnO PEC cell at a bias of 0.4 V under AM1.5 light irradiation.

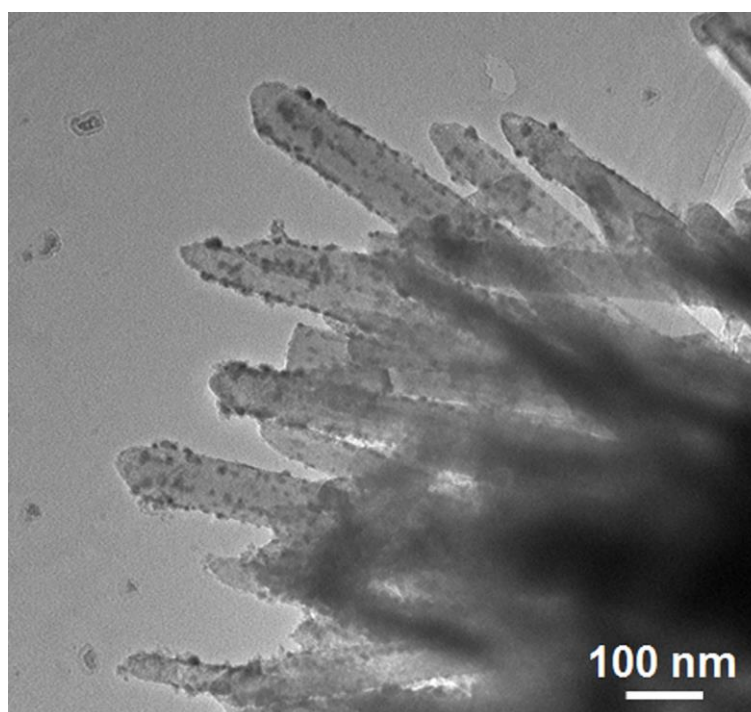

**Figure S11.** TEM image of Au@CdS-ZnO photoanode after H<sub>2</sub> evolution testing.

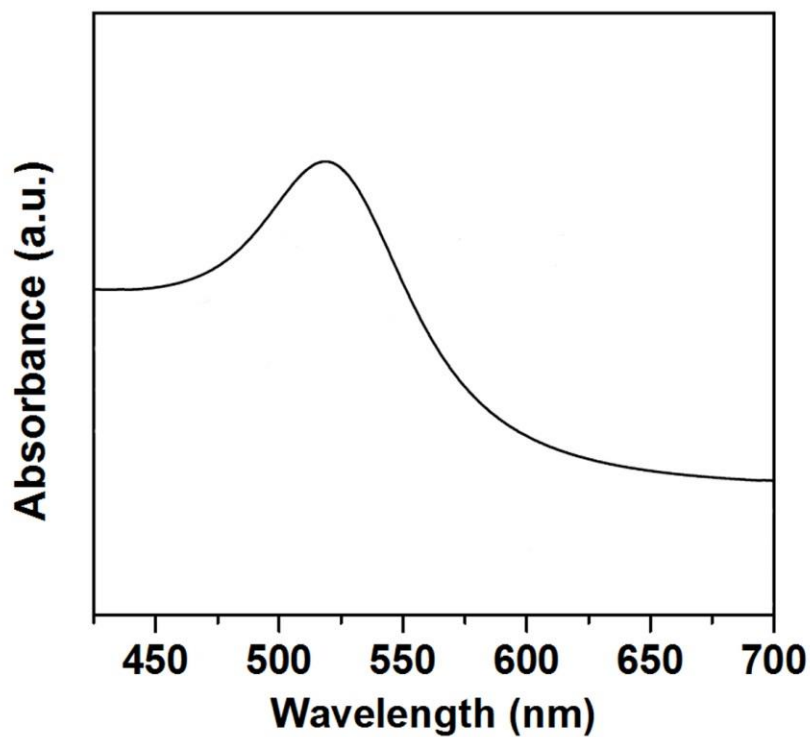

**Figure S12.** Optical absorption spectrum of aqueous solution of Au nanoparticles.

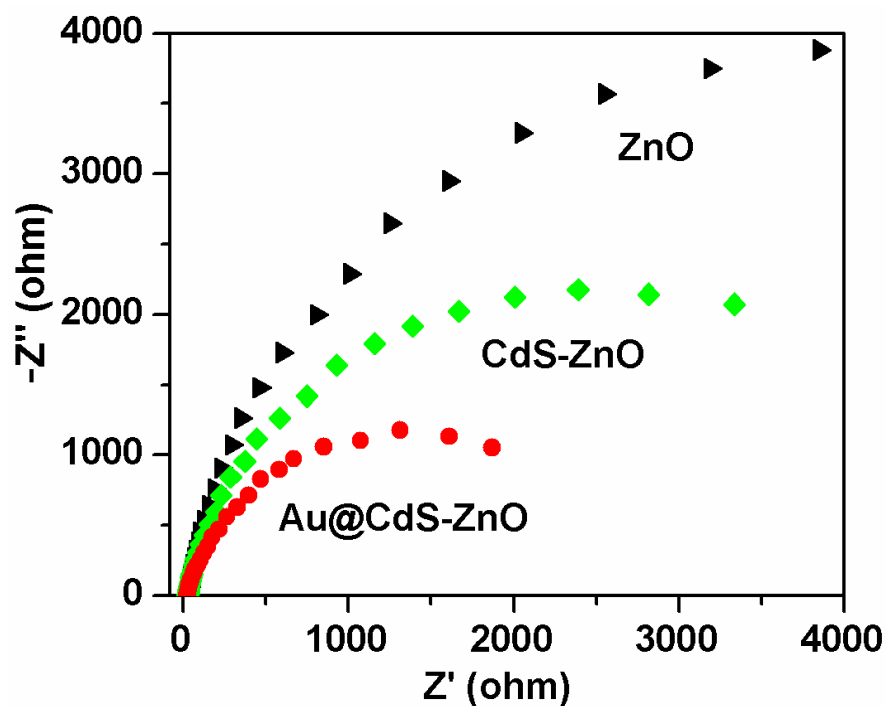

**Figure S13.** Electrochemical impedance spectroscopy (EIS) spectra of the PEC cells recorded at open circuit voltage under AM1.5 light irradiation.
